# Supplementary material for: Eggshell protein modified cotton fabric for flexible and sustainable piezoelectric wearable sensors
Source: Royal Society of Chemistry journal article supplement (doi:10.1039/d4tc02122c), 2024-01-01
Supplement: d4tc02122c1.pdf [file d4tc02122c1.pdf]

# Supporting Information

## **Eggshell protein modified cotton fabric for flexible and sustainable piezoelectric wearable sensors**

Xinhua Liang, ‡<sup>a</sup> Hao Xu, ‡<sup>a</sup> Xuliang Yu, <sup>a</sup> Tian Luo, <sup>a</sup> Honglian Cong, <sup>a</sup>

Gaoming Jiang, <sup>a</sup> Lei Xu, <sup>b</sup> Seeram Ramakrishna <sup>\*c</sup> and Haijun He <sup>\*a</sup>

<sup>a</sup> Engineering Research Center for Knitting Technology, Ministry of Education, Jiangnan University, Wuxi, Jiangsu 214122, China.

E-mail: hhj@jiangnan.edu.cn

<sup>b</sup> School of Textile Science and Engineering, Tiangong University, Tianjin 300387, China.

<sup>c</sup> Center for Nanotechnology and Sustainability, Department of Mechanical Engineering, National University of Singapore, Singapore, 117576, Singapore.

E-mail: seeram@nus.edu.sg

### Note S1. Calculation of stiffness

Five samples of 20 cm × 2.5 cm were prepared for each sample respectively. The sample was put on the platform of stiffness tester to test the extension length (L) with bending angle of 41.5 ° from the horizontal direction. The stiffness of all the samples is calculated according to formula (1).

$$G = m \times C^3 \times 10^{-3} \quad (1)$$

where  $G$  is the stiffness of the sample,  $m$  is the gram weight of the sample,  $C$  is the average bending length of the sample, which is 1/2 of the extension length.

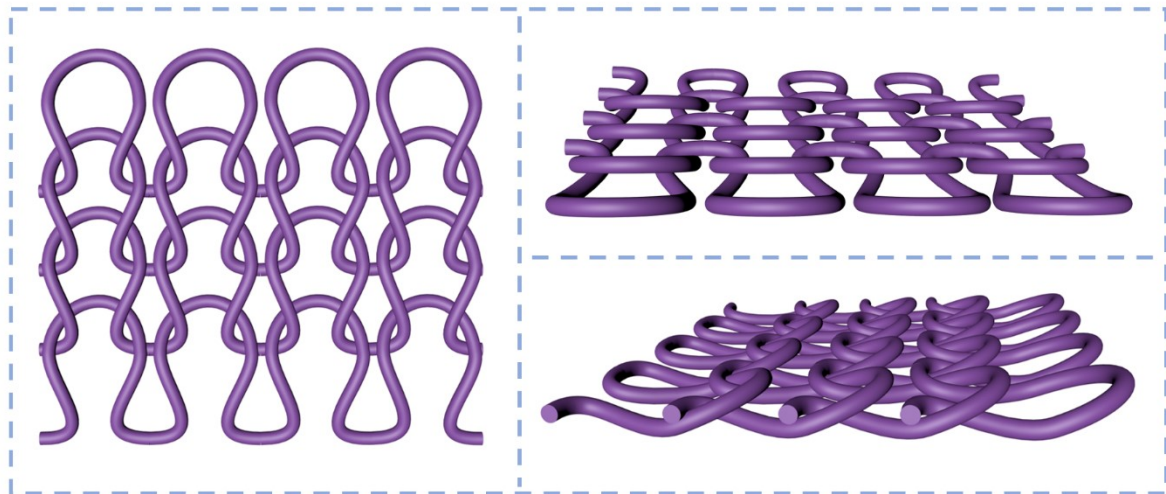

**Fig. S1** The 3D rib structure of cotton fabric.

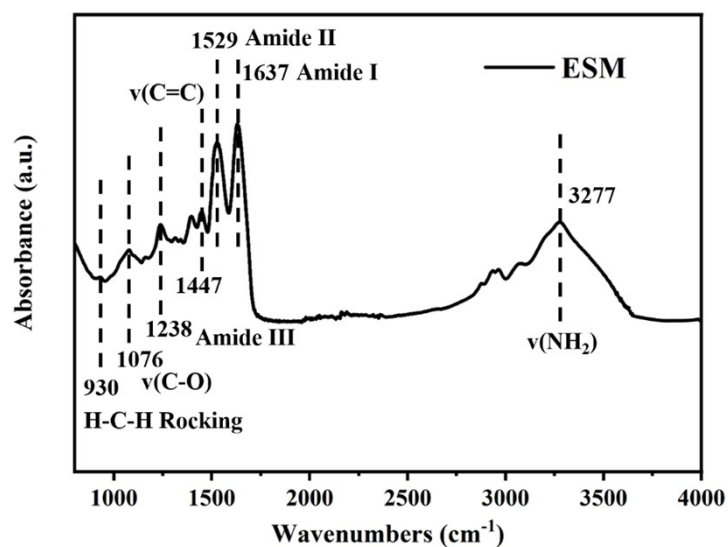

**Fig. S2** FTIR spectra of the ESM.

**Note S2. Calculation of crystallinity**

The total degree of the crystallinity ( $x_{c_t}$ ) of the samples is calculated according to formula (2) from XRD patterns using the curve deconvolution method.<sup>1</sup>

$$x_{c_t} = \frac{\sum A_{crys}}{\sum A_{crys} + \sum A_{amp}} \times 100\% \quad (2)$$

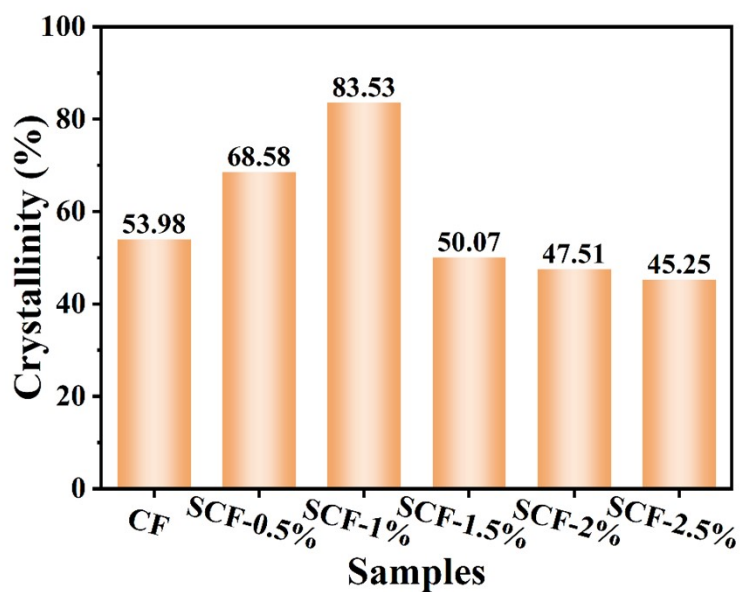

**Fig. S3** Crystallinity of all samples calculated from XRD patterns.

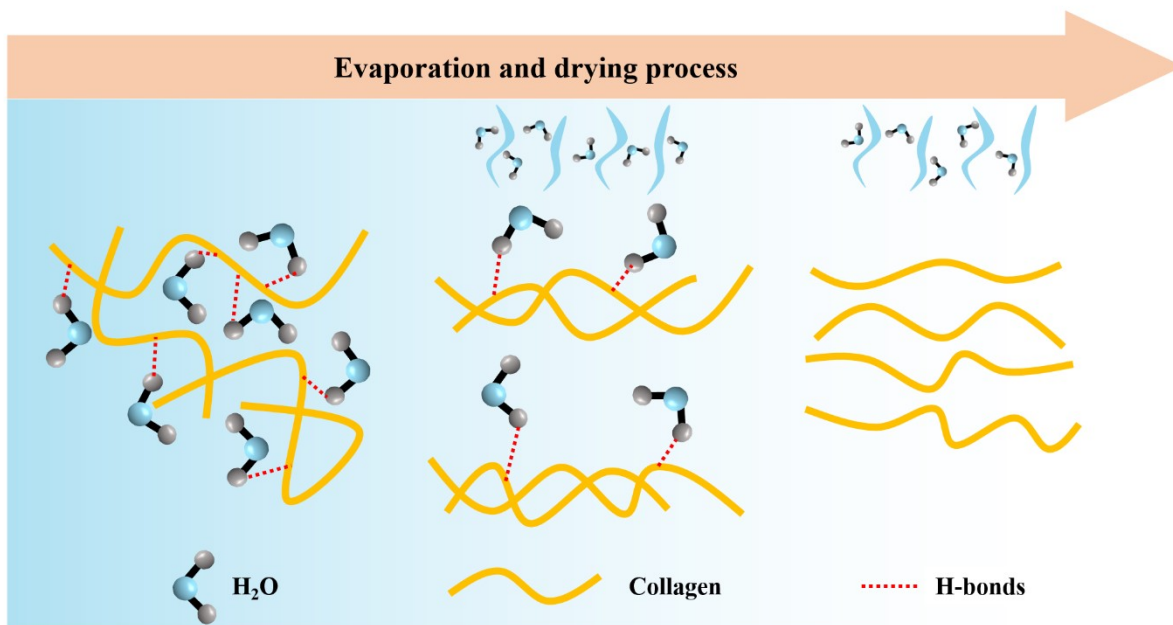

**Fig. S4** Mechanism of reorientation of molecule chains formed by SEP and water molecules during the drying of the composites.

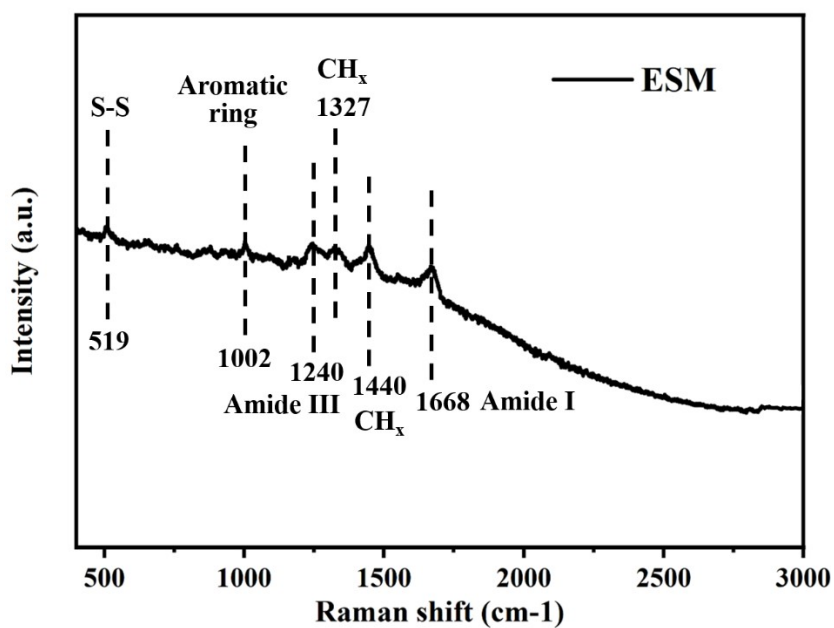

**Fig. S5** Raman spectrum of ESM.

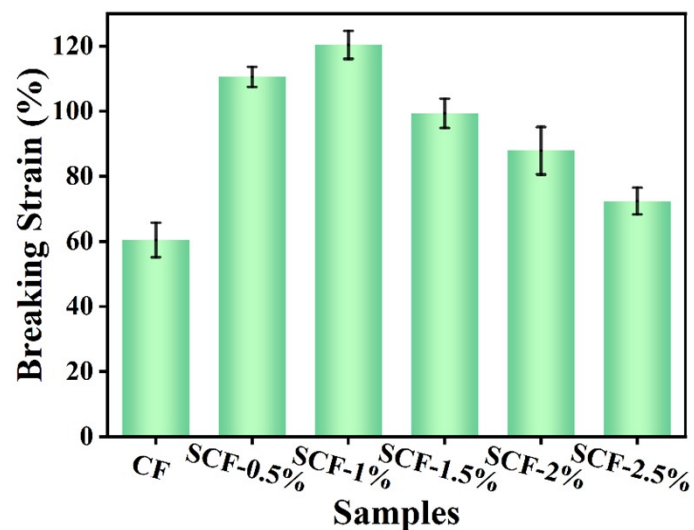

**Fig. S6** Breaking strain of different samples. Mean  $\pm$  SD of three independent experiments were shown (n=3).

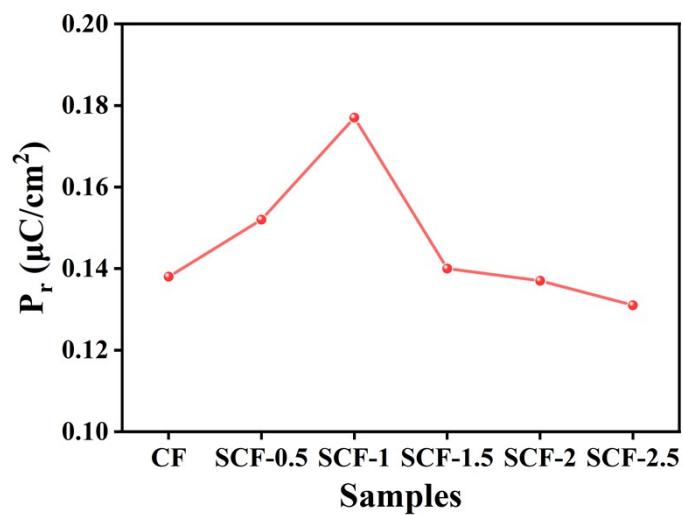

**Fig. S7** Remnant polarization ( $P_r$ ) of pristine cotton fabric and SEP-coated fabrics.

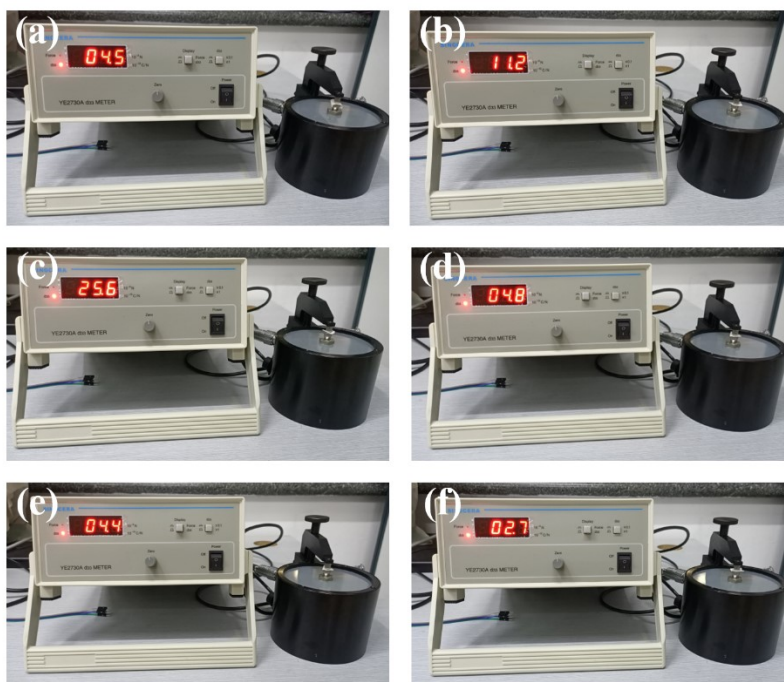

**Fig. S8** Piezoelectric constant ( $d_{33}$ ) of (a) pristine cotton, (b) SCF-0.5, (c) SCF-1.0, (d) SCF-1.5, (e) SCF-2.0 and (f) SCF-2.5 measured by a commercial  $d_{33}$  meter.

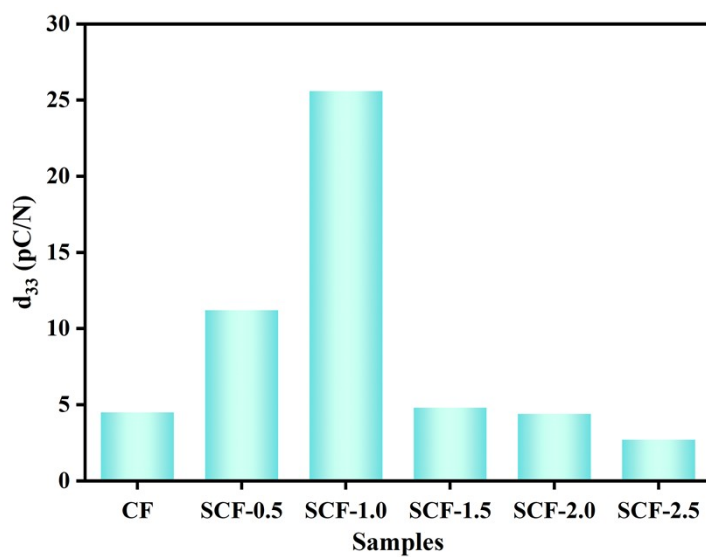

**Fig. S9**  $d_{33}$  of pristine cotton fabric and SEP-coated fabrics.

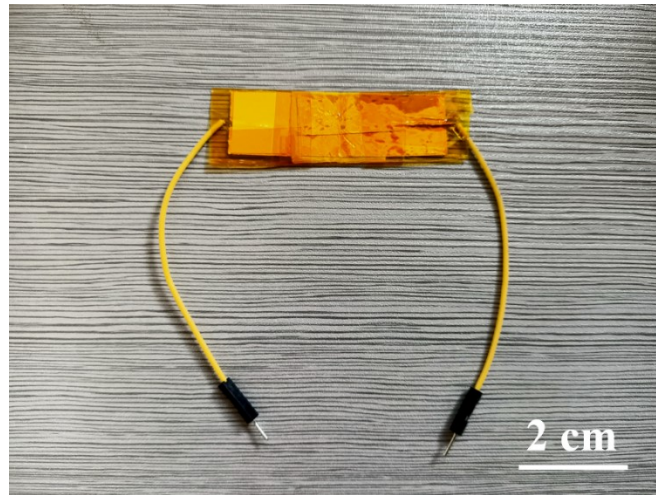

**Fig. S10** Optical image of the as-proposed device.

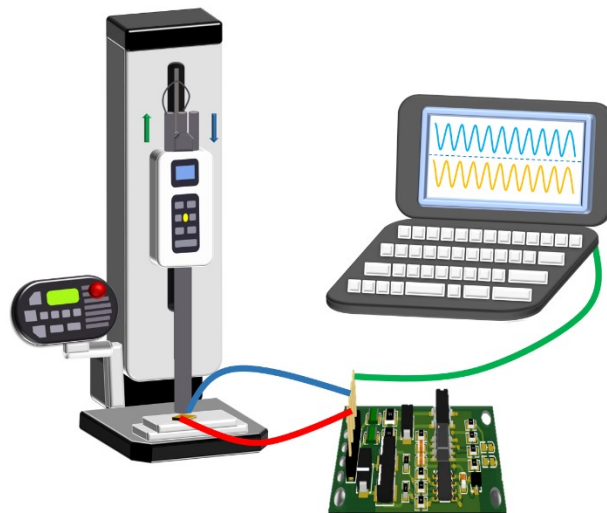

**Fig. S11** Schematic illustrations of the piezoelectric test device.

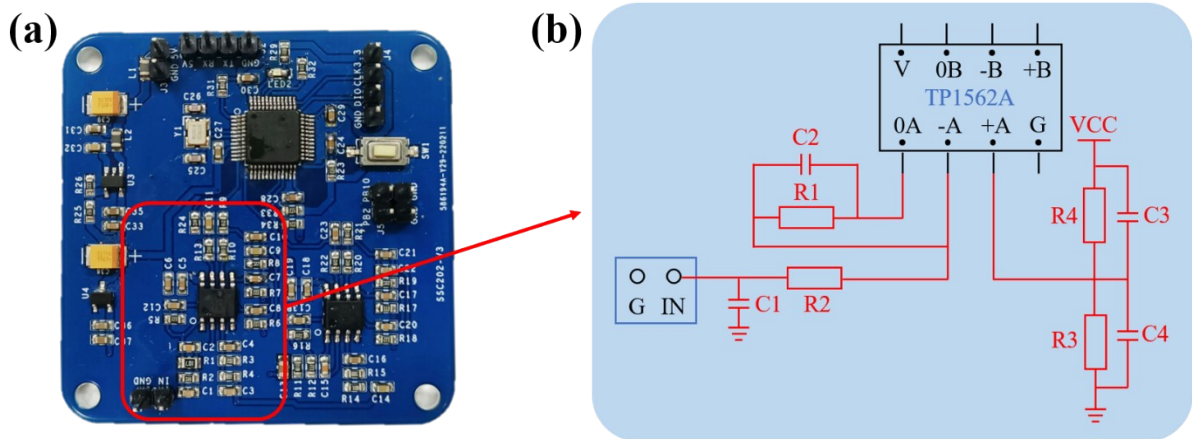

**Fig. S12** (a) The flexible thin-film piezoelectric sensing system. (b) The preamplifier circuit diagram.

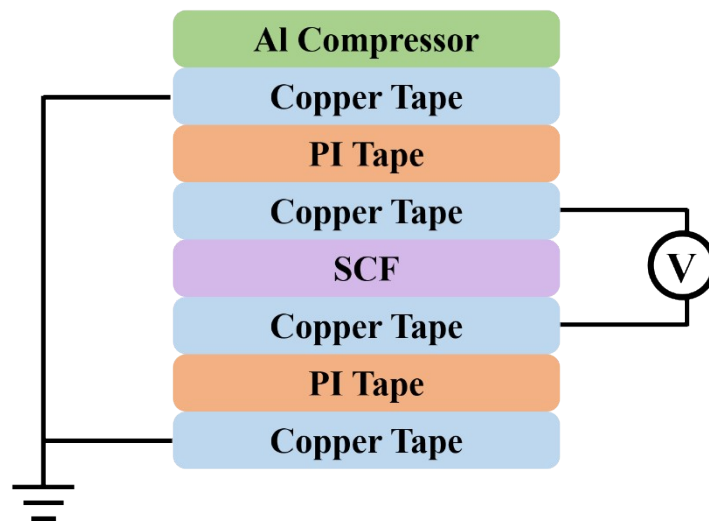

**Fig. S13** The test configuration of the sensors to avoid frictional electrical signals.



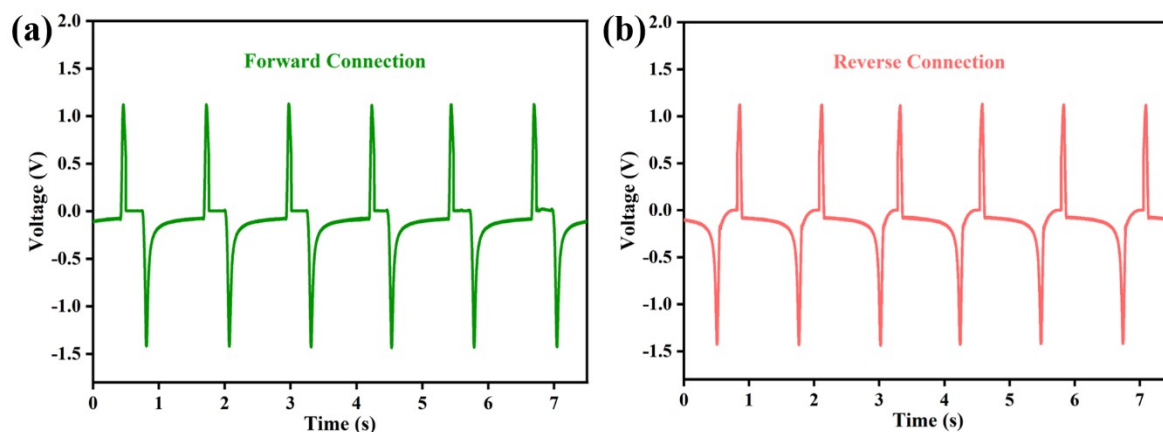

**Fig. S14** Short-circuit current measurements of the piezoelectric device in the forward connection (a) and the reverse connection (b).

**Table S1.** The tensile stress-strain curves data of pristine cotton fabric and SEP-coated fabrics.

| Sample   | The maximum tensile stress (%) | Breaking strain (%) | Young's modulus (MPa) |
|----------|--------------------------------|---------------------|-----------------------|
| CF       | 3.98±0.14                      | 60.42±5.32          | 1.12±0.08             |
| SCF-0.5% | 4.94±0.19                      | 110.55±3.15         | 0.53±0.03             |
| SCF-1%   | 5.96±0.23                      | 120.37±4.37         | 0.81±0.04             |
| SCF-1.5% | 5.23±0.10                      | 99.36±4.53          | 0.90±0.06             |
| SCF-2%   | 4.78±0.12                      | 87.86±7.34          | 1.61±0.05             |
| SCF-2.5% | 4.59±0.27                      | 72.36±4.15          | 1.98±0.06             |

## References

- 1 S. K. Karan, R. Bera, S. Paria, A. K. Das, S. Maiti, A. Maitra and B. B. Khatua, *Adv. Energy Mater.*, 2016, **6**, 1601016.
